# Supplementary material for: A Neutral Polysaccharide from Spores of Ophiocordyceps gracilis Regulates Oxidative Stress via NRF2/FNIP1 Pathway
Source: MDPI journal article supplement (doi:10.3390/ijms241914721), 2023-09-29
Supplement: s1 [file s1]

## ***Supplementary Material***

### **A neutral polysaccharide from spores of *Ophiocordyceps gracilis* regulates oxidative stress via NRF2/FNIP1 pathway**

**Yue Wang, Shixiang Wei, Hui Lian, Lingling Tong, Linhui Yang, Bo Ren, Dongsheng Guo<sup>\*</sup> and He Huang**

School of Food Science and Pharmaceutical Engineering, Nanjing Normal University, NO 1, Wenyuan Road, Nanjing 210023, China.

**\* Correspondence:**

Dongsheng Guo  
guodongs@njnu.edu.cn

He Huang  
huangh@njnu.edu.cn

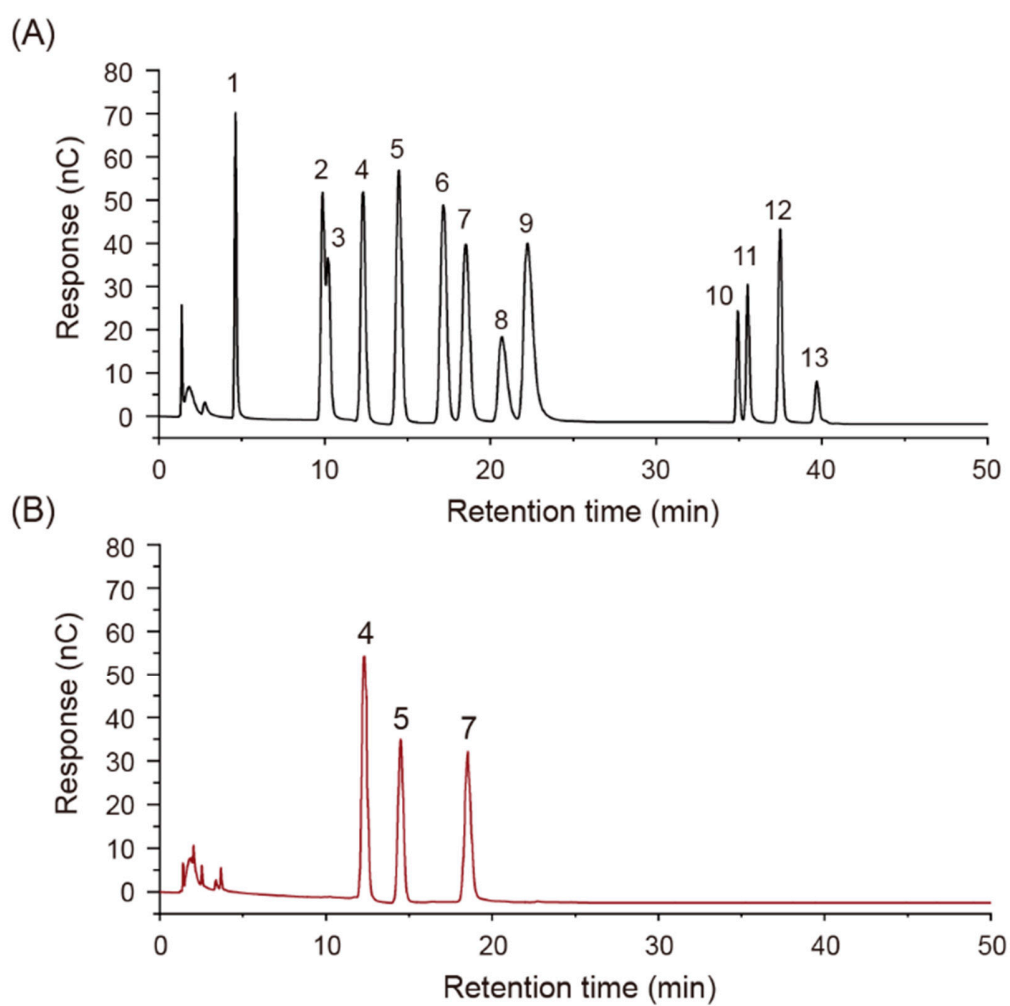

**Figure S1.** The HPAEC chromatograms of standard monosaccharides (A) and GSP-1a monosaccharide components (B). (1. Fuc, 2. Ara, 3. Rha, 4. Gal, 5. Glc, 6. Xyl, 7. Man, 8. Fru, 9. Rib, 10. Gal-UA, 11. Gul-UA, 12. Glc-UA, 13. Man-UA).

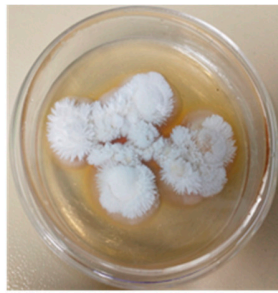

***Paraisaria dubia* strain**

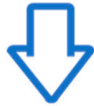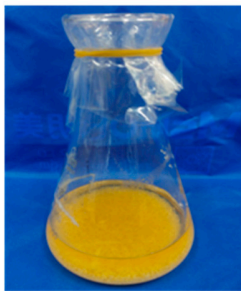

**Seed solution**

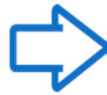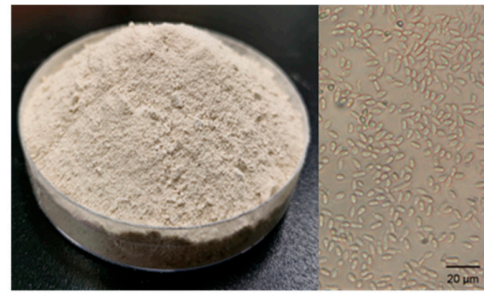

**Spore powder**

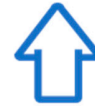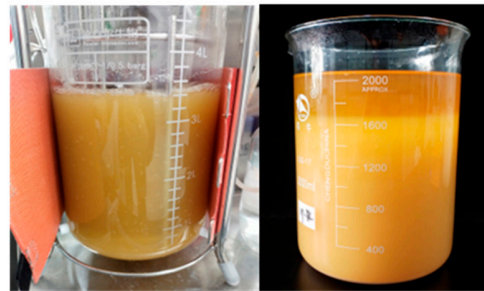

**Fermentation cultivation**

**Figure S2.** The preparation of *Ophiocordyceps gracilis* fermentation spore powder.

**Table S1** Primer sequences

|              | Forward primer                 | Reverse primer                    |
|--------------|--------------------------------|-----------------------------------|
| <i>Ho-1</i>  | GCCAGCAACAAAGTGCAAGA           | TAAGGACCCATCGGAGAAGC              |
| <i>Gclm</i>  | GACAAAACACAGTTGGAACAGC         | CAGTCAAATCTGGTGGCATC              |
| <i>Nqo1</i>  | TGGTGGAGTCGGACCTCTATG          | CATGGCAGCGTAAGTGTAAGC             |
| <i>NRF2</i>  | GCCTGTAAGTCCTGGTCATCG          | GCTCTTTGGACATCATTTTCGTTG          |
| <i>KEAP1</i> | TGTCCTCAATCGTCTCCTTTATGC       | CCGCTTCGGATGGTGTTCATT             |
| <i>FNIP1</i> | TGAAAGTGAAGATACAGGTCATGA<br>TA | CAGCACTCACTTCGATTAACCTTG          |
| <i>FEM1B</i> | CACTCCATCATCATTAGCCTAGTTG<br>A | TGTACTTTTGTCTAGCGGAGTCTTATT<br>CT |
| <i>GAPD</i>  | CGACCACTTTGTCAAGCTCA           | AGGGGTCTACATGGCAACTG              |
| <i>H</i>     |                                |                                   |
